1                   **Signatures of mito-nuclear climate adaptation in a warbler species complex**

2  
3  
4                   Silu Wang<sup>1</sup>, Madelyn J. Ore<sup>1,2</sup>, Else K. Mikkelsen<sup>1,3</sup>, Julie Lee-Yaw<sup>4,5</sup>, Sievert Rohwer<sup>6</sup>, and  
5                   Darren E. Irwin<sup>1</sup>  
6  
7  
8  
9

10                   <sup>1</sup> Department of Zoology, 6270 University Blvd, University of British Columbia, Vancouver, BC, V6T1Z4,  
11                   Canada

12                   <sup>2</sup> Current address: Cornell Lab of Ornithology, Ithaca, New York, 14850, USA

13                   <sup>3</sup> Current address: Department of Ecology and Evolutionary Biology, University of Toronto, Toronto, ON,  
14                   M1C 1A4, Canada

15                   <sup>4</sup> Department of Botany, 3200-6270 University Blvd, University of British Columbia, Vancouver, BC,  
16                   V6T1Z4, Canada

17                   <sup>5</sup> Current address: Biological Sciences, 4401 University Drive, University of Lethbridge, Lethbridge,  
18                   Alberta, T1K3M4, Canada

19                   <sup>6</sup> Department of Biology and Burke Museum, Box 353010, University of Washington, Seattle, Washington  
20                   98195, USA;  
21

22 **Abstract**

23

24 Mitochondrial (mtDNA) and nuclear (nDNA) genes interact to govern metabolic  
25 pathways of mitochondria. When differentiated populations interbreed at secondary  
26 contact, incompatibilities between mtDNA of one population and nDNA of the other  
27 could result in low fitness of hybrids. Hermit Warblers (*S. occidentalis* abbreviated as  
28 HEWA) and inland Townsend's Warblers (*Setophaga townsendi*, abbreviated as i-  
29 TOWA) exhibit distinct mtDNA haplotypes and a few nDNA regions of high  
30 differentiation, whereas coastal TOWA (c-TOWA) displays a mix of these genetic  
31 patterns consistent with ancient hybridization of HEWA and i-TOWA. Of the few highly-  
32 differentiated nDNA regions between i-TOWA and HEWA, two of these regions (on  
33 chromosome 5 and Z, respectively) are also differentiated between c-TOWA and i-  
34 TOWA, similar to the mtDNA pattern. These two nDNA regions are associated with  
35 mitochondrial fatty acid metabolism. Moreover, these nDNA regions are correlated with  
36 mtDNA ancestries among sites, a pattern consistent with mito-nuclear co-adaptation.  
37 Such mito-nuclear coevolution might be driven by climate-related selection, because the  
38 mito-nuclear ancestry is correlated with climatic conditions among sampling sites. These  
39 results suggest that cryptic differentiation in this species complex has been shaped by  
40 climate-correlated adaptation associated with mito-nuclear fatty acid metabolism.

41

42 **Key Words:** *speciation, inter-genomic interaction, mito-nuclear co-adaptation, genetic*  
43 *incompatibility, carnitine shuttle, climate adaptation, Setophaga.*

## 44 **Introduction**

45 Mitochondrial (mtDNA) and nuclear (nDNA) genomes co-function in  
46 maintaining critical functions that influence fitness in all eukaryotes (1–5). Populations in  
47 different areas may harbour distinct mtDNA owing to selection or drift, and because  
48 many nuclear genes encode proteins that function within mitochondria, the two sets of  
49 DNA are expected to co-evolve, each being the target of selection favoring compatibility  
50 with the other (4, 6, 7). Interbreeding at species boundaries can lead to sub-optimal mito-  
51 nuclear combinations in hybrids. Specifically, hybrids with nDNA from one species and  
52 mtDNA from the other species may have lowered fitness. These types of genetic  
53 incompatibilities can play a role in keeping hybrid zones narrow and limiting gene flow  
54 between species (8, 9). Hence coadaptation of mtDNA and nDNA is increasingly  
55 recognized as being important to speciation (8–10).

56 Geographic variation in climate is known to select for different mitochondrial  
57 genotypes in different areas (6, 11, 12). This may in turn lead to indirect selection on co-  
58 functioning nuclear genes. Such climatic mito-nuclear coadaptation can lead to genomic  
59 differentiation between population inhabiting different climatic conditions (4, 6). Here we  
60 examine the relationship between mtDNA and nDNA variation in a warbler species  
61 complex with ancient and ongoing hybridization between partially differentiated  
62 populations. In particular, we ask whether there is signature of mito-nuclear coevolution.  
63 If so, could climate-related selection have driven such coevolution?

64 While secondary contact between differentiated populations sometimes leads to  
65 narrow hybrid zones (13), another possible outcome is the formation of a hybrid or mixed  
66 population over a broad region (14–16). Such populations have the potential to reveal

67 strong selection on suboptimal combinations of genes from the two parental species.  
68 Despite increasing interest in mito-nuclear interactions at species boundaries of natural  
69 populations with complex population histories (3, 6, 17–20), the degree to which mito-  
70 nuclear interactions are important in the differentiation among lineages is not well  
71 understood.

72 Hermit warblers, *S. occidentalis* (referred to as HEWA), inhabit conifer forests  
73 along the states of Oregon, California, and southern Washington, U.S.A. To the north of  
74 HEWA, Townsend’s warblers *Setophaga townsendi* (referred to as TOWA) consist of an  
75 inland population that inhabits areas east of the Coast Mountains of British Columbia,  
76 Canada and northern Washington, USA (referred as i-TOWA) and a coastal populations  
77 (referred as c-TOWA) west of the Coast Mountains (Figure 1A) (21–25). The HEWA  
78 and i-TOWA populations demonstrate distinct plumage and mtDNA haplotypes  
79 (separated by ~0.8% sequence divergence, diverged ~0.5 million years ago, Figure 1BC)  
80 (21, 23, 24, 26), and nDNA difference at a few small genomic regions, one related to  
81 plumage differences (ASIP-RALY gene block), whereas the rest of the genome shows  
82 very little differentiation (27).

83 The c-TOWA population is phenotypically identical to i-TOWA, but harbors both  
84 HEWA and i-TOWA mtDNA haplotypes (Figure 1BC), suggesting this population is the  
85 product of ancient hybridization between HEWA and i-TOWA (24) (Figure 1A). If so,  
86 the nuclear genome of c-TOWA should demonstrate a mix of these two ancestries as  
87 well. In particular, if the mitochondria-related nDNA regions that are differentiated  
88 between HEWA and i-TOWA (26) coevolved with the mitochondrial genome, we expect  
89 these nDNA regions to differentiate between i-TOWA and c-TOWA as well. In contrast,



90 the plumage gene region (represented by the RALY SNP) that differs between HEWA  
91 and i-TOWA is expected to remain undifferentiated between c-TOWA and i-TOWA.

92 The nuclear genome of c-TOWA is thus far unknown. Here, we analyze variation  
93 at tens of thousands of single nucleotide polymorphisms (SNPs) throughout the nuclear  
94 genome of various HEWA, c-TOWA and i-TOWA populations. In particular, we ask (1)  
95 whether the nuclear genomic data is consistent with the mtDNA inference that coastal  
96 *townsendi* resulted from admixture; (2) whether the genetic differentiation is related to  
97 mitochondrial metabolism, suggesting mito-nuclear coevolution; (3) whether there is  
98 climate-related selection on mitonuclear coevolution?

99

## 100 **Methods**

### 101 **Museum samples, mtDNA sequences, and nDNA sequencing**

102 As a baseline for understanding the relationships among mtDNA haplotypes and  
103 their distributions, sequences of the mtDNA NADH dehydrogenase subunit 2 gene (ND2)  
104 for 223 individuals (95 c-TOWA, 81 i-TOWA, and 47 HEWA) from the Krosby and  
105 Rohwer (2009) study were acquired from GenBank (accession numbers FJ373895-  
106 FJ374120). To understand the relationships among the mtDNA sequences, we generated  
107 a minimum spanning haplotype network (27) with PopART (28). This network showed  
108 two clearly separated haplotype clusters. To understand spatial variation in mtDNA  
109 haplotypes, we colored individual c-TOWA sites differently. We then scored each  
110 haplotype as 0 and 1 respectively for those that are nested within HEWA haplotype  
111 cluster and the i-TOWA cluster (24) (Figure 1C).

112           Among these individuals with previously-sequenced mtDNA (i.e., from Krosby  
113 and Rohwer 2009), we selected a subset of tissue samples (64 i-TOWA, 58 c-TOWA,  
114 and 15 HEWA; obtained from the Burke Museum of Natural History and Culture,  
115 University of Washington, Seattle, Washington) for nuclear genomic sequencing. We  
116 supplemented this set of genetic samples with 30 blood samples that we obtained directly  
117 from birds caught in the field during the breeding season of 2016; these included 25  
118 HEWA from California, USA, and 5 i-TOWA from Montana, USA.

### 119 **GBS pipeline**

120           We prepared genotyping-by-sequencing (GBS) (29) libraries from DNA samples  
121 of the 167 individuals described above as our previous study (30). Briefly, we digested  
122 genomes with the restriction enzyme PstI, then ligated fragments with barcode and  
123 adaptors, and amplified with PCR. Amplified DNA was pooled into two libraries which  
124 were then paired-end sequenced: the first (80 individuals) were sequenced with an  
125 Illumina HiSeq 2500 automated sequencer (read length = 125bp), and the second (85  
126 individuals) were sequenced with an Illumina HiSeq 4000 (read length = 100bp). After  
127 sequencing, we removed two of the HEWA samples because of insufficient read depth  
128 and a labeling error respectively, thus 23 HEWA remained for further analysis. To  
129 control for plate effects, we randomly assigned samples to different plates and included  
130 replicates of three samples among plates. Sequences processing is consistent with our  
131 previous study (30). Specifically, the reads were demultiplexed with a custom script and  
132 then trimmed using Trimmomatic (31) [TRAILING:3 SLIDINGWINDOW:4:10  
133 MINLEN:30]. Assuming synteny between *Setophaga* and *Taeniopygia guttata* (Zebra  
134 Finch) genomes given the evidence of limited rearrangement in avian genomes (32, 33),

135 we aligned reads to a *T. guttata* reference (34) with bwa-mem (35) (default settings).  
136 Variable sites were identified with GATK (36), which resulted in 3,446,846 variable sites  
137 among the 165 individuals in the study. We then filtered the variable sites with VCFtools  
138 (37) according to the following criteria: 1) removing indels, 2) keeping sites with  
139 genotype quality (GQ) > 20, 3) keeping sites with minor allele frequency (MAF)  $\geq$  0.05,  
140 4) removing sites with > 30% missing genotypes among individuals, and 5) keeping  
141 biallelic single nucleotide polymorphisms (SNPs) only. Thereafter 19,083 SNPs  
142 remained. To visually evaluate whether there were any plate effects, we compared  
143 duplicated samples among different plates, and then visualized samples sequenced on  
144 different plates in a principal component analysis (on the covariance matrix). Since plate  
145 allocation was random, there should not be a difference in PC space partitioning among  
146 the plates. The duplicated samples were compared and then removed from further  
147 analysis.

#### 148 **Population structure and genomic differentiation**

149 To examine if the nDNA c-TOWA is a mixture of HEWA and i-TOWA,  
150 population structure was examined with principle component analysis (PCA) in the  
151 SNPRelate (38) package in R and ancestry assignments in Faststructure with a uniform  
152 prior,  $10^8$  iterations, and K values from 1 to 6 (39). We set out to assess the differences  
153 between HEWA, c-TOWA, and i-TOWA. However, the PCA revealed obvious structure  
154 within c-TOWA with Valdez, AK (USA) and Haida Gwaii, BC (Canada) populations  
155 distinct from the rest of the c-TOWA populations. Thus in subsequent analysis, we  
156 compared each of the three c-TOWA groups to the i-TOWA and HEWA groups. We

157 used the SNPRelate (38) package in R to examine which SNPs were highly correlated  
158 with principal component axes.

159 To examine population differentiation across the genome, for each of the 19,083  
160 filtered SNPs we calculated  $F_{ST}$  (40) with VCFtools (37) between 1) i-TOWA ( $N = 69$ )  
161 and HEWA ( $N = 38$ ); 2) c-TOWA ( $N = 58$ : 10 Haida Gwaii, 15 Valdez, 33 others) and i-  
162 TOWA; and 3) HEWA and each of the three c-TOWA clusters.

### 163 **Candidate genetic regions**

164 The SNPs at  $F_{ST}$  peaks between c-TOWA and i-TOWA that are also consistent  
165 with the peaks between HEWA and i-TOWA were considered candidate loci for further  
166 analyses. One possibility is that these loci are linked to genes that have a mitochondrial  
167 function and selection maintains their concordance with mtDNA ancestry. To examine  
168 whether these loci are known to be associated with mitochondrial function, we examined  
169 what is known about the protein-coding genes in vicinity of the candidate SNPs, using  
170 Ensembl (41) and the zebra finch reference genome. If a large region of elevated  $F_{ST}$  is  
171 involved, Zebrafinch Gene Ontology analysis (42) was conducted to test regional  
172 functional enrichment relative to the rest of the genome. While HEWA and i-TOWA  
173 differ at the RALY locus that is associated with plumage differences (26), we did not  
174 expect this region to differ between coastal and i-TOWA due to their identical plumage  
175 features.

### 176 **Association of mtDNA and nDNA**

177 Coevolution between genomes is expected to lead to association between mtDNA  
178 and mt-associated nuclear genes within and among sites. If individuals with mismatched  
179 mt-nDNA genotypes are selected against, there should be an association between mtDNA

180 and nDNA genotypes within each population. Such a force could be counteracted by  
181 random mating which breaks down the mt-nDNA association, thus strong selection is  
182 required to maintain adaptive mt-nDNA combinations within a single randomly mating  
183 population. Over time however, specific geographic regions may favor a particular  
184 mtDNA variant and a compatible nDNA variant, increasing mt-nDNA concordance  
185 among sampling sites.

186 To examine within-population association between mtDNA and nDNA ancestry,  
187 we conducted permutation tests of independence with the *coin* package (43) in R to  
188 examine if there is association between mtDNA group (0 or 1) and nuclear candidate  
189 SNP genotype (0 as homozygous HEWA, 0.5 as heterozygous, or 1 as homozygous i-  
190 TOWA) within Valdez and the North Vancouver Island populations (c-TOWA sites with  
191  $N \geq 10$ ). The Haida Gwaii population is almost fixed for the HEWA mt haplotype group  
192 (Figure 1C), thus mt-nDNA coadaptation would predict that the mitochondrial co-  
193 functioning nDNA region is more HEWA-like than the rest of the genome in this  
194 population.

195 Although mito-nuclear coevolution could be masked by random mating within a  
196 population, its signature can be captured in the mito-nuclear ancestry associations among  
197 populations, which reflects long-term ancestry dynamics. We first calculated the mean  
198 mtDNA and nDNA ancestry of each site by averaging the locus-specific ancestry (0 for  
199 HEWA and 1 for i-TOWA) among individuals. To examine between-population  
200 association between mtDNA and nDNA variants of interest (one on chr 5 and one on chr  
201 Z), we employed a partial mantel test (44) with the *vegan* package in R to quantify the  
202 association between the among-sites ( $N = 19$ ) distance matrices of mtDNA ancestry and

203 the nDNA ancestry, while controlling for overall genomic ancestry (i.e., proportion  
204 HEWA vs. i-TOWA). In particular, the partial mantel test examined correlation between  
205 the among-sites distance matrix of mtDNA and that of the nDNA locus, conditioned on  
206 the among-sites distance matrix of admixture index. The admixture index is represented  
207 by the PC1 of the genomic PCA with the candidate SNPs (all the SNPs in the 700kb  
208 differentiation block on chr5 and the SNP at the peak on chrZ) removed. We employed  
209 the genomic PC1 instead of a model-based admixture proportion because the complex  
210 admixture history in this case likely violates assumptions of model-based approaches  
211 (39). These approaches tend to force admixed individuals into either of the parental  
212 clusters, and the output admixture indices for each individual largely depend on the prior  
213 distribution (30). In contrast, genomic PC1 naturally represents the admixture between i-  
214 TOWA and HEWA (Figure1D).

## 215 **Climate analysis**

216 To investigate whether there might be selection on mt-nDNA related to climate,  
217 we tested association of site-level mt-nDNA ancestry (the averaged site ancestry score of  
218 mtDNA, chr 5, and chr Z marker ancestry) and climate variation. To effectively capture  
219 annual climate variation among sites, we extracted data from 26 climate variables (Table  
220 S1) from ClimateWNA (45) and used PCA to describe climatic variation among sites.  
221 We computed pairwise differences between sites for a) PC1 values b) PC2 values c)  
222 geographic distance and d) mt-nuclear ancestry. We then looked for an association  
223 between climate differences among sites and differences in mt-nDNA ancestry while  
224 controlling for geographic distance using a partial mantel test in R with 10000  
225 permutations.

226

## 227 **Results**

### 228 **Population structure**

229       The mtDNA haplotype clusters are distinct between i-TOWA and HEWA, with  
230 0.8% minimum mtDNA sequence divergence (Krosby and Rohwer 2009; Figure 1C).  
231 Various c-TOWA sampling sites contain a mixture of i-TOWA haplotypes and HEWA  
232 haplotypes (Figure 1C), suggesting that these c-TOWA populations are hybrid  
233 populations between i-TOWA and HEWA (Krosby and Rohwer 2009). Nuclear genomic  
234 variation as assessed through variation in the 19,083 SNPs reveals a pattern broadly  
235 consistent with the variation in mtDNA. The i-TOWA and HEWA form two clearly  
236 differentiated clusters differing in the first principal component (PC1) of a PCA (Figure  
237 1D, S1), and most individuals from c-TOWA have a somewhat intermediate position.  
238 Faststructure analysis further supports the hybrid origin of c-TOWA as  $k = 2$  was most  
239 supported and c-TOWA demonstrate admixture between HEWA and i-TOWA ancestry  
240 (Figure S2). However, we found substructure within c-TOWA with Valdez and Haida  
241 Gwaii forming distinct clusters from the rest (Figure 1D). Valdez differs primarily along  
242 the second principal component (PC2), whereas Haida Gwaii differs by a combination of  
243 PC1 and PC2. While PC1 is highly correlated with a few strong outlier SNPs, PC2 shows  
244 only modest correlations with particular SNPs (Figure S1). Moreover, Valdez and Haida  
245 Gwaii demonstrate comparable differentiation to the parental populations as the  
246 differentiation between the parental populations (HEWA and i-TOWA) (Figure 1D, S3).

### 247 **$F_{ST}$ distribution**

248       Genome-wide levels of differentiation show that HEWA and i-TOWA are very  
249 similar (Weir and Cockerham's  $F_{ST} = 0.030$ ) except for a few peaks of differentiation

250 (Figure 2A). As in the PCA,  $F_{ST}$  analysis indicates the Valdez and Haida Gwaii c-TOWA  
251 populations are more differentiated from both HEWA and i-TOWA than other c-TOWA  
252 are (see  $F_{ST}$  values in Figure 2). The rest of the c-TOWA are more similar to i-TOWA  
253 (Weir and Cockerham's  $F_{ST}=0.009$ ) than to HEWA (Weir and Cockerham's  $F_{ST}=  
254 0.021$ ).

255 The i-TOWA and HEWA have a number of peaks of differentiation, with the  
256 three highest standing out in particular (Figure 2A) and mapping to chromosomes (chr) 5,  
257 20, and Z in the *T. guttata* reference. One of these (on chr 20) is in the intron of the  
258 RALY gene (26), which is known to regulate pigmentation in quail and mice (46, 47).  
259 Our earlier study of admixture mapping in the ongoing hybrid zone between i-TOWA  
260 and HEWA in the Washington Cascades (26) suggested that this locus is highly  
261 associated with plumage colour patterns within that zone. As predicted, the present  
262 analysis of genomic variation over a much broader geographic region shows high  
263 differentiation at the RALY SNP between sampling regions that differ in plumage (i.e.,  
264 between HEWA and i-TOWA, Figure 2A, F-H) and low differentiation between regions  
265 with similar plumage (i.e., between c-TOWA and i-TOWA, Figure 2B-D).

## 266 **Mitonuclear genetics**

267 Similar to the chr20 RALY peak, the chr5 and chrZ regions also showed extreme  
268 differentiation in the comparison of i-TOWA and HEWA, but opposite to RALY region,  
269 these regions also stand out in the comparison between c-TOWA and i-TOWA as the two  
270 highest regions of differentiation between those groups (Figure 2A-B). The chr5  
271 differentiation (Figure 2A-C, 3A) involves a ~ 700kb region that is significantly enriched  
272 for lipid metabolism ( $p = 0.0013$ ,  $p_{adjusted} = 0.021$ ) related to mitochondrial function with



273 particular relevance to acyl-CoA metabolic process ( $p = 0.0027$ ,  $p_{adjusted} = 0.021$ ),  
274 thiolester hydrolase ( $p = 0.002$ ,  $p_{adjusted} = 0.021$ ), and palmitoyl-coA hydrolase activity ( $p$   
275  $= 3.7 \times 10^{-6}$ ,  $p_{adjusted} = 0.0001$ ), due to the genes ENSTGUG00000011215 and  
276 ENSTGUG00000018133 (orthologs of ACOT, acyl-CoA thioesterase). The chr Z SNP  
277 (position 66226657 in the *T. guttata* reference) is within the intron of the BBOX1 gene  
278 (gamma-butyrobetaine hydroxylase 1) (Figure 3B), which codes for a biosynthesis  
279 enzyme of carnitine. Carnitine is the central player in the ‘carnitine shuttle’ of  
280 mitochondria, which activates and transports fatty acid into mitochondria for beta-  
281 oxidation (Figure 3C) (1, 48, 49). The other gene associated with this chrZ differentiation  
282 is a cytoplasmic-related gene TNP01 that encodes nuclear-cytoplasmic signaling protein,  
283 transportin1 (50) (Figure 3B). This chrZ region of differentiation could be narrow, as  
284 SNPs flanking this chrZ peak do not demonstrate high  $F_{ST}$  (Figure 3B). The chr5 and Z  
285 regions are functionally linked to each other as well through the ‘carnitine shuttle’ of  
286 mitochondria (Figure 3C). A moderate peak was found in the  $F_{ST}$  scan between the i-  
287 TOWA versus other c-TOWA at chr1A (54442413) (Figure 2B), which is in the inter-  
288 genic region between golgi gene CHST11 (Carbohydrate Sulfotransferase 11) and the  
289 cytoplasmic-functioning gene TXNRD1 (Thioredoxin Reductase 1) (Figure S4).

## 290 **Mitonuclear association**

291 We then examined whether mtDNA (Figure 1C) and the candidate nDNA  
292 markers on chr 5 and Z (Figure 3AB) genotypes were correlated, both among (Figure 4)  
293 and within sampling sites (Figure S5) of the admixed c-TOWA population. Among sites,  
294 both the chr 5 (Figure 4 AB, partial mantel pearson’s product-moment  $r = 0.736$ ,  $p < 10^{-4}$ )  
295 and chr Z marker (Figure 4 AC, partial mantel pearson’s product-moment  $r = 0.270$ ,  $p$

296 = 0.03) were correlated with the mtDNA ancestry after controlling for the effect of  
297 admixture represented by the distance matrix of genomic PC1 (see Methods). Within  
298 sampling sites, partial mitonuclear association was observed. In Valdez, there is an  
299 estimated association between mtDNA ancestry and both chr 5 and chr Z marker  
300 ancestry, although this was statistically significant only for chr 5 (chr 5 marker:  $Z = 2.44$ ,  
301  $N = 14$ ,  $p_{(FDR-corrected)} = 0.03$ , Figure S5A; chr Z marker:  $Z = 2.14$ ,  $N = 12$ ,  $p_{(FDR-corrected)} =$   
302  $0.065$ , Figure S5B). In the North Vancouver Island population, neither the chr 5 ( $Z = -$   
303  $1.41$ ,  $N = 9$ ,  $p = 0.157$ ) nor the chr Z ( $Z = -0.57$ ,  $N = 11$ ,  $p = 0.572$ ) marker was  
304 significantly associated with mtDNA ancestry (Figure S5A-B). Consistent with the mt-  
305 nDNA coadaptation prediction, the *townsendi* homozygotes for the chr 5 and Z markers  
306 are missing in the Haida Gwaii *townsendi* population (Figure S5), in which the HEWA  
307 mt haplotypes are almost fixed (Figure 1BC).

### 308 **Climatic association**

309 Climate PC1 (Figure 5AC, S7) explains 64.4% of the variation in climate among  
310 sites; this PC was not particularly explained by one or a few climate variables (Figure  
311 S7A, B; Table S2). Climate PC2 explains 23.5% of the variation and was predominantly  
312 explained by four climate variables (Figure S7C, S8; Table S2): Temperature Difference  
313 (TD), Climate Moisture Index (CMI), Mean Annual Precipitation (MAP), Winter  
314 Precipitation (PPT\_wt). The climate in c-TOWA habitat is similar to that of i-TOWA  
315 along PC1, but more similar to that of HEWA along PC2, although there is great climate  
316 variation among various c-TOWA populations (Figure 5ACD). Overall, the c-TOWA  
317 habitat is moister and more stable in temperature, which is consistent with the coastal-  
318 inland humidity gradient (captured by PC2, Figure 5D), and the distribution of mt-nDNA

319 ancestry appears related to this geographical variation in climate. The mt-nDNA ancestry  
320 is significantly correlated with climate PC1 (Figure 5C) (partial mantel test,  $r = 0.194$ ,  $p$   
321  $= 0.040$ ) as well as climate PC2 (partial mantel test,  $r = 0.221$ ,  $p = 0.025$ , Figure 5B)  
322 among 19 sites.

323

## 324 **Discussion**

325 Hermit warblers (HEWA) and inland Townsend's warblers (i-TOWA) are distinct  
326 in mtDNA (24) and exhibit three strong regions of differentiation in the nuclear genome  
327 (26), whereas coastal Townsend's warblers (c-TOWA) harbor admixed mtDNA and  
328 nDNA ancestry from HEWA and i-TOWA. Two of the three regions of strong  
329 differentiation between HEWA and i-TOWA, on chr 5 and Z, differentiate coastal and i-  
330 TOWA as well. Both of these nDNA regions contain genes that are strong candidates for  
331 coadaptation with mtDNA, as they are both involved in the mitochondrial carnitine  
332 shuttle for fatty acid metabolism. Mitonuclear coadaptation was further supported by mt-  
333 nDNA association within Valdez population and among populations. This coadaptation is  
334 likely associated with climatic adaptation, because the site-level mito-nuclear ancestry  
335 covaries with the site climate conditions.

## 336 **Coevolution of mtDNA and nDNA**

337 We found the key nDNA differences between c-TOWA versus i-TOWA reside at  
338 loci on chr 5 and chr Z associated with mitochondrial fatty acid metabolism (Figure 3), an  
339 intriguing result given that coastal and i-TOWA differ so strongly in their mitochondrial  
340 haplotype frequencies. This finding points to the possibility of selection on mito-nuclear  
341 cofunctions (9, 10). The BBOX1 gene encodes Gamma-butyrobetaine dioxygenase (51),

342 the enzyme that catalyses L-carnitine synthesis (52), which is critical for transporting  
343 fatty acids across mitochondrial membranes during beta oxidation (49). Carnitine co-  
344 functions with mtDNA and the chr5 region that is enriched for mitochondrial fatty acid  
345 metabolism are both involved in ‘carnitine shuttle’ (Figure 3C). The HEWA nDNA may  
346 be partially incompatible with the *townsendi* mtDNA in jointly forming the functional  
347 carnitine shuttle leading to selection against mismatched mito-nuclear ancestries. Such  
348 selection maintaining mito-nuclear concordance can be counteracted by random mating  
349 in admixed populations at each generation and is thus difficult to detect in samples of  
350 individuals from a single population. However, mito-nuclear ancestry concordance can be  
351 more easily detected through comparison of many populations. This association (Figure  
352 4) reveals the potential selection maintaining a functionally compatible mito-nuclear  
353 ‘carnitine shuttle’ over a large temporal and spatial scale.

354         These mito-nuclear genotypes are significantly associated with climate,  
355 suggesting potential selection on the mt-nDNA combinations related to climate or habitat  
356 (which is also associated with climate). The climate in the c-TOWA is similar to i-  
357 TOWA habitat along PC1, but similar to HEWA habitat along PC2. Correlations between  
358 any two traits that have large-scale geographic variation are expected, making it difficult  
359 to confidently infer causality from such associations alone. However, the climate and  
360 habitat differences between HEWA, i-TOWA, and c-TOWA are very strong, such that  
361 these differences likely cause some selective differences. These patterns are reminiscent  
362 of the *Eopsaltria australis* (Eastern Yellow Robin) system in which distinct mt-nDNA  
363 combinations are maintained between inland and coastal habitat (6). Fatty acid metabolic  
364 genes have also been shown to be targets of climatic adaptation in humans, within

365 Siberian (53) and Greenlandic Inuit populations (54). Temperature (55) and humidity  
366 (56) both influence mitochondrial fatty acid metabolism during beta oxidation, which  
367 highly depends on carnitine (55, 56). BBOX1-ACOT-mtDNA genotypes might result in  
368 functional difference in fatty acid metabolism that is adapted to specific climate (moist  
369 and stable versus dry and variable) in the breeding habitat of these warblers.

370       Because HEWA has apparently inhabited coastal areas for a long period of time,  
371 the HEWA mt-nDNA gene combination may be more suited for coastal habitats  
372 compared to those of *townsendi*. If the HEWA mt-nDNA genotype is favored in the  
373 coastal habitats, the frequency of HEWA mt-nDNA gene combinations would tend to  
374 increase in c-TOWA populations over time. However, ongoing gene flow between i-  
375 TOWA and c-TOWA would slow down or prevent such an increase. The Haida Gwaii  
376 island and Valdez population could have escaped from such a balance between selection  
377 and gene flow due to their isolation from the rest of the populations respectively by the  
378 sea and mountain ranges. Another possibility is that frequency-dependent selection is  
379 maintaining long-term mt-nDNA polymorphism in the c-TOWA. Future investigation on  
380 the spatial and temporal variation of mtDNA-BBOX1-ACOT co-segregation would shed  
381 light on the evolutionary forces shaping the present and future of c-TOWA population.

### 382 **Genomic architecture of differentiation**

383       The distribution of  $F_{ST}$  across the genome comparing various c-TOWA to either  
384 HEWA and i-TOWA is consistent with the “genic” view of differentiation (26, 57, 58), in  
385 which peaks of differentiation represent genetic targets of selection (divergent selection  
386 or selection against hybrids) that are highly distinct between populations despite the rest  
387 of the genome being homogenized by gene flow (57–59). Despite this ‘selection with

388 gene flow' scenario exhibiting a similar genomic differentiation landscape as the classic  
389 'divergence with gene flow' model (58, 60), the underlying process is different. In this  
390 system, there is a known allopatric phase when HEWA and *townsendi* were separated by  
391 ice sheets (Figure 1A) (21, 24). Genetic differentiation that accumulated in allopatry (as  
392 opposed to gradual build up at sympatry or parapatry under 'divergence with gene flow')  
393 can be homogenized by hybridization at secondary contact, while the climate-related  
394 genomic targets (on chr 5 and Z) of selection remain differentiated.

395       Between c-TOWA and HEWA, there are a number of highly differentiated loci  
396 (Fig. 2F), one of which is the RALY SNP that was found through admixture mapping to  
397 be highly associated with plumage in the narrow Cascades hybrid zone between i-TOWA  
398 and HEWA (26). The fact that this marker has now been shown to be strongly associated  
399 with plumage both within a local hybrid zone and throughout the whole i-TOWA and  
400 HEWA species complex is strong evidence for a causal link between the RALY-ASIP  
401 genetic region and plumage differences.

#### 402 **Biogeography and semi-parallel introgression**

403       In addition to being an empirical test of mitonuclear coevolution, the present  
404 study also helps clarify the biogeographic history of this warbler complex. Our genomic  
405 evidence is consistent with Krosby and Rohwer's (24) conclusion, based on mtDNA, that  
406 coastal British Columbia and Alaska was inhabited by geographically structured HEWA  
407 populations before *townsendi* expanded from inland areas and mixed with them (24). The  
408 HEWA and i-TOWA mtDNA haplotype groups demonstrate many differences (~0.8%),  
409 whereas both are common in c-TOWA. It is unlikely that the polymorphisms in mtDNA  
410 and nDNA in the c-TOWA were caused by incomplete lineage sorting, as opposed to

411 hybridization (Figure 1A). In a scenario of incomplete lineage sorting, enough time  
412 would have passed following population splitting for both i-TOWA and HEWA to have  
413 lost the alternative haplotype, while the c-TOWA maintained both. Over such a period of  
414 time, sizeable differences would be expected between the HEWA haplotypes found in  
415 HEWA population versus c-TOWA, as well as between i-TOWA haplotypes found in  
416 coastal versus i-TOWA population. We did not observe such a pattern, as c-TOWA has  
417 some mtDNA haplotypes that are identical to HEWA and some that are identical to i-  
418 TOWA haplotypes.

419         The higher genome-wide differentiation of the Haida Gwaii and Valdez  
420 populations (Figure 2) is consistent with at least partially isolated cryptic refugia of  
421 HEWA in coastal Alaska and Haida Gwaii during the last glacial maximum (LGM) (61).  
422 Following expansion of i-TOWA from the inland area, presumably after the last glacial  
423 period, hybridization between i-TOWA and HEWA apparently led to populations of  
424 mixed ancestry along the coast of British Columbia and Alaska (Figure 1A). These  
425 coastal populations have the plumage patterns and colors of i-TOWA, which is why they  
426 have been classified as members of that species. This uniform i-TOWA appearance has  
427 concealed a more complex history of hybridization with ancient and geographically  
428 differentiated populations of HEWA.

429         Following expansion of i-TOWA from the interior, gene flow into Haida Gwaii  
430 may have been weak due to the expanse of water separating it from the mainland,  
431 explaining why that population is more similar to HEWA than other c-TOWA are. Gene  
432 flow into Valdez could have also been impeded by geographical barriers, as Valdez is  
433 surrounded by mountain ranges (Chugach mountains, Wrangell mountains, and St. Elias

434 mountains). However, both nuclear and genomic data indicate that Valdez has substantial  
435 ancestry from both i-TOWA and HEWA. Despite genome-wide differentiation among  
436 these three c-TOWA genetic clusters, there is an interesting parallelism: all the three  
437 populations exhibit the i-TOWA-like RALY marker that is associated with plumage (26),  
438 and predominantly HEWA-like mitochondria-related markers. Such parallelism might be  
439 driven by parallel adaptation to the coastal climate.

#### 440 **Caveats and future directions**

441 While our findings are consistent with mito-nuclear coadaptation being important  
442 in the pattern of genomic differentiation within this species complex, this being an  
443 observational study we cannot definitively conclude that is the case. The strong  
444 associations between geographic variation in climate, mitochondrial haplotypes, and  
445 highly differentiated regions of the genome, along with the known roles of those  
446 divergent regions in mitochondrial metabolism and the abundant evidence for mito-  
447 nuclear coadaptation in other systems (reviewed by (7, 9)), add up to strong correlative  
448 evidence for mito-nuclear adaptation in this case. One possibility is that the nuclear and  
449 mitochondrial loci are independently selected by the environment, without actual  
450 coevolution between the two. Future experimental study should investigate this  
451 possibility to distinguish it from actual coevolution. If there is mito-nuclear coadaptation,  
452 there should be (1) an epistatic effect of mtDNA and nDNA on fatty acid metabolic  
453 phenotypes; (2) the high frequency fatty acid metabolic phenotypes (underpinned by  
454 mito-nuclear epistasis) within each site should be more fit for local climate than foreign  
455 climate.

456



## 457 **Conclusion**

458           Examination of genomic differentiation in this young species group has revealed  
459 patterns consistent with climate-related coadaptation among mitochondrial and nuclear  
460 genes involved in fatty-acid metabolism. Consistent with the mtDNA pattern, the c-  
461 TOWA demonstrate a nuclear genomic pattern consistent with ancient admixture  
462 between i-TOWA and a geographically structured ancient HEWA population. Three  
463 genetic clusters of c-TOWA are characterized by a mixed genetic ancestry between the  
464 parental populations (HEWA and i-TOWA), providing natural replicates for examining  
465 the role of selection in shaping genomic differentiation. These three c-TOWA clusters  
466 exhibit parallel differentiation from i-TOWA at two of the three most differentiated  
467 genomic regions (on chr 5 and chr Z) between i-TOWA and HEWA. Both of these  
468 genetic regions are involved in mitochondrial fatty acid metabolism. The geographic  
469 distributions of the mito-nuclear genetic combinations related to fatty acid metabolism  
470 are associated with geographic variation in climate, suggesting mt-nDNA coevolution  
471 may have occurred in response to selection for climate adaptation. Such climate-related  
472 mito-nuclear selection could be an important force driving population differentiation in  
473 this species complex.

## 474 **Data Accessibility**

475           Sequence data is deposited in GenBank SRA (accession number: PRJNA573930;  
476 ID: 573930). Secondary analytical data tables have been deposited in dryad  
477 (<https://doi.org/10.5061/dryad.44j0zpc9t>).

478

## 479 **Acknowledgements**

480 We are grateful to Sharon Birks (Burke Museum) and Chris Wood (Burke  
481 Museum) for access to the tissue samples for sequencing. We thank Geoffrey E. Hill for  
482 inspiring ideas to this study. We also thank Gil Henriques for providing digital  
483 illustrations of the warblers. For helpful discussion we thank Sally Otto, Dolph Schluter,  
484 Loren Rieseberg, Dahong Chen, Mike Whitlock, Andrea Thomaz, Armando Geraldés,  
485 Meade Krosby, Jared Grummer, and members of the Irwin Lab. We are grateful for  
486 research funding provided by the Natural Sciences and Engineering Research Council of  
487 Canada (grants 311931-2012, RGPIN-2017-03919 and RGPAS-2017-507830 to DEI;  
488 and PGS D 331015731 to SW), a Werner and Hildegard Hesse Research Award in  
489 Ornithology and a UBC Four Year Doctoral Fellowship to SW. For research permits we  
490 thank Environment Canada, U. S. Geological Survey, Departments of Fish & Wildlife of  
491 Washington, Idaho, and Montana, and the UBC Animal Care Committee.

492

## 493 **References**

- 494 1. S. E. Calvo, V. K. Mootha, The Mitochondrial Proteome and Human Disease.  
495 *Annu. Rev. Genomics Hum. Genet.* **11**, 25–44 (2010).
- 496 2. N. Lane, Mitonuclear match: Optimizing fitness and fertility over generations  
497 drives ageing within generations. *BioEssays* **33**, 860–869 (2011).
- 498 3. D. Bar-Yaacov, *et al.*, Mitochondrial involvement in vertebrate speciation? The  
499 Case of mito-nuclear genetic divergence in chameleons. *Genome Biol. Evol.* **7**,  
500 3322–3336 (2015).
- 501 4. G. E. Hill, *Mitonuclear Ecology* (Oxford University Press, 2019).
- 502 5. J. W. O. Ballard, M. C. Whitlock, The incomplete natural history of mitochondria.  
503 *Mol. Ecol.* **13**, 729–744 (2004).
- 504 6. H. E. Morales, *et al.*, Concordant divergence of mitogenomes and a mitonuclear  
505 gene cluster in bird lineages inhabiting different climates. *Nat. Ecol. Evol.* **2**,

- 506 1258–1267 (2018).
- 507 7. G. E. Hill, *et al.*, Assessing the fitness consequences of mitonuclear interactions in  
508 natural populations. *Biol. Rev.* **94**, consequences of mitonuclear interactions in  
509 natu (2019).
- 510 8. R. S. Burton, R. J. Pereira, F. S. Barreto, Cytonuclear Genomic Interactions and  
511 Hybrid Breakdown. *Annu. Rev. Ecol. Evol. Syst.* **44**, 281–302 (2013).
- 512 9. G. E. Hill, The mitonuclear compatibility species concept. *Auk* **134**, 393–409  
513 (2017).
- 514 10. R. S. Burton, F. S. Barreto, A disproportionate role for mtDNA in Dobzhansky-  
515 Muller incompatibilities? *Mol. Ecol.* **21**, 4942–4957 (2012).
- 516 11. P. Innocenti, E. H. Morrow, D. K. Dowling, Experimental evidence supports a sex-  
517 specific selective sieve in mitochondrial genome evolution. *Science (80-. )*. **332**,  
518 845–848 (2011).
- 519 12. A. E. Harada, T. M. Healy, R. S. Burton, Variation in thermal tolerance and its  
520 relationship to mitochondrial function across populations of *Tigriopus*  
521 *Californicus*. *Front. Physiol.* (2019) <https://doi.org/10.3389/fphys.2019.00213>.
- 522 13. N. H. Barton, G. M. Hewitt, Adaptation, speciation and hybrid zones. *Nature* **341**,  
523 497–503 (1989).
- 524 14. T. O. Elgvin, *et al.*, The genomic mosaicism of hybrid speciation. *Sci. Adv.* **3**,  
525 e1602996 (2017).
- 526 15. M. Schumer, R. Cui, D. L. Powell, G. G. Rosenthal, P. Andolfatto, Ancient  
527 hybridization and genomic stabilization in a swordtail fish. *Mol. Ecol.* **25**, 2661–  
528 2679 (2016).
- 529 16. L. H. Rieseberg, Hybrid origins of plant species. *Annu. Rev. Ecol. Syst.* (1997)  
530 <https://doi.org/10.1146/annurev.ecolsys.28.1.359>.
- 531 17. P. A. Gagnaire, E. Normandeau, L. Bernatchez, Comparative genomics reveals  
532 adaptive protein evolution and a possible cytonuclear incompatibility between  
533 European and American Eels. *Mol. Biol. Evol.* **29**, 2909–2919 (2012).
- 534 18. J. B. M. Sambatti, D. Ortiz-Barrientos, E. J. Baack, L. H. Rieseberg, Ecological  
535 selection maintains cytonuclear incompatibilities in hybridizing sunflowers. *Ecol.*  
536 *Lett.* **11**, 1082–1091 (2008).
- 537 19. T. Z. Baris, *et al.*, Evolved genetic and phenotypic differences due to  
538 mitochondrial-nuclear interactions. *PLoS Genet.* **13**, e1006517 (2017).
- 539 20. Z. Boratyński, T. Ketola, E. Koskela, T. Mappes, The Sex Specific Genetic

- 540 Variation of Energetics in Bank Voles, Consequences of Introgression? *Evol. Biol.*  
541 **43**, 37–47 (2016).
- 542 21. J. T. Weir, D. Schluter, Ice sheets promote speciation in boreal birds. *Proc. R. Soc.*  
543 *B Biol. Sci.* **271**, 1881–1887 (2004).
- 544 22. S. Rohwer, C. Wood, Three Hybrid Zones Between Hermit and Townsend ' S  
545 Warblers in Washington and Oregon. *Auk* **115**, 284–310 (1998).
- 546 23. S. Rohwer, E. Bermingham, C. Wood, Plumage and mitochondrial DNA haplotype  
547 variation across a moving hybrid zone. *Evolution (N. Y.)*. **55**, 405–422 (2001).
- 548 24. M. Krosby, S. Rohwer, A 2000 km genetic wake yields evidence for northern  
549 glacial refugia and hybrid zone movement in a pair of songbirds. *Proc. R. Soc. B*  
550 *Biol. Sci.* **276**, 615–621 (2009).
- 551 25. M. Krosby, S. Rohwer, Ongoing movement of the hermit warbler X Townsend's  
552 Warbler Hybrid Zone. *PLoS One* **5**, e14164 (2010).
- 553 26. S. Wang, *et al.*, Selection on a pleiotropic color gene block underpins early  
554 differentiation between two warbler species. *bioRxiv*,  
555 <https://doi.org/10.1101/853390> (2019).
- 556 27. H. J. Bandelt, P. Forster, A. Röhl, Median-joining networks for inferring  
557 intraspecific phylogenies. *Mol. Biol. Evol.* **16**, 37–48 (1999).
- 558 28. J. W. Leigh, D. Bryant, POPART: Full-feature software for haplotype network  
559 construction. *Methods Ecol. Evol.* **6**, 1110–1116 (2015).
- 560 29. R. J. Elshire, *et al.*, A robust, simple genotyping-by-sequencing (GBS) approach  
561 for high diversity species. *PLoS One* **6**, e19379 (2011).
- 562 30. S. Wang, S. Rohwer, K. E. Delmore, D. E. Irwin, Cross-decades stability of an  
563 avian hybrid zone. *J. Evol. Biol.* **32**, 1242–1251. (2019).
- 564 31. A. M. Bolger, M. Lohse, B. Usadel, Trimmomatic: A flexible trimmer for Illumina  
565 sequence data. *Bioinformatics* **30**, 2114–2120 (2014).
- 566 32. G. Zhang, *et al.*, Comparative genomics reveals insights into avian genome  
567 evolution and adaptation. *Science (80-. )*. **346**, 1311–1320 (2014).
- 568 33. H. Ellegren, Evolutionary stasis: the stable chromosomes of birds. *Trends Ecol.*  
569 *Evol.* **25**, 283–291 (2010).
- 570 34. W. C. Warren, *et al.*, The genome of a songbird. *Nature* **464**, 757–762 (2010).
- 571 35. H. Li, Aligning new-sequencing reads by BWA BWA : Burrows-Wheeler Aligner.  
572 *Slides* (2010) <https://doi.org/10.1002/pssa.200673542>.

- 573 36. M. D. McKenna, Aaron, Matthew Hanna, Eric Banks, Andrey Sivachenko,  
574 Kristian Cibulskis, Andrew Kernytsky, Kiran Garimella, David Altshuler, Stacey  
575 Gabriel, *et al.*, The Genome Analysis Toolkit: A MapReduce framework for  
576 analyzing next-generation DNA sequencing data. *Genome Res.* (2010)  
577 <https://doi.org/10.1101/gr.107524.110.20>.
- 578 37. P. Danecek, *et al.*, The variant call format and VCFtools. *Bioinformatics* **27**, 2156–  
579 2158 (2011).
- 580 38. X. Zheng, *et al.*, A high-performance computing toolset for relatedness and  
581 principal component analysis of SNP data. *Bioinformatics* **28**, 3326–3328 (2012).
- 582 39. A. Raj, M. Stephens, J. K. Pritchard, fastSTRUCTURE: Variational Inference of  
583 Population Structure in Large SNP Datasets. *Genetics* **197**, 573–589 (2014).
- 584 40. B. S. Weir, C. C. Cockerham, Estimating F-Statistics for the Analysis of  
585 Population Structure. *Evolution (N. Y.)*. **38**, 1358 (1984).
- 586 41. S. E. Hunt, *et al.*, Ensembl variation resources. *Database (Oxford)*. **2018** (2018).
- 587 42. X. Wu, M. Watson, CORNA: Testing gene lists for regulation by microRNAs.  
588 *Bioinformatics* **25**, 832–833 (2009).
- 589 43. T. Hothorn, K. Hornik, M. A. van De Wiel, A. Zeileis, Implementing a Class of  
590 Permutation Tests COIN Package. *J. Stat. Softw.* **28**, 1–23 (2008).
- 591 44. P. Legendre, *Numerical ecology, 2nd English Edition* (Elsevier Science, 1998)  
592 <https://doi.org/10.1017/CBO9781107415324.004>.
- 593 45. T. Wang, A. Hamann, D. L. Spittlehouse, T. Q. Murdock, ClimateWNA-high-  
594 resolution spatial climate data for western North America. *J. Appl. Meteorol.*  
595 *Climatol.* **51**, 16–29 (2012).
- 596 46. E. J. Michaud, *et al.*, A molecular model for the genetic and phenotypic  
597 characteristics of the mouse lethal yellow (Ay) mutation. *Proc. Natl. Acad. Sci.* **91**,  
598 2562–2566 (1994).
- 599 47. N. J. Nadeau, *et al.*, Characterization of Japanese quail yellow as a genomic  
600 deletion upstream of the avian homolog of the mammalian ASIP (agouti) gene.  
601 *Genetics* **178**, 777–786 (2008).
- 602 48. K. Tars, *et al.*, Targeting carnitine biosynthesis: Discovery of new inhibitors  
603 against  $\gamma$ -butyrobetaine hydroxylase. *J. Med. Chem.* **57**, 2213–2236 (2014).
- 604 49. N. Longo, M. Frigeni, M. Pasquali, Carnitine transport and fatty acid oxidation.  
605 *Biochim. Biophys. Acta - Mol. Cell Res.* **1863**, 2422–2435 (2016).
- 606 50. J. Brelstaff, *et al.*, Transportin1: A marker of FTLN-FUS. *Acta Neuropathol.* **122**,

- 607 591–600 (2011).
- 608 51. F. M. Vaz, S. Van Gool, R. Ofman, L. Ijlst, R. J. A. Wanders, Carnitine  
609 biosynthesis: Identification of the cDNA encoding human  $\gamma$ -butyrobetaine  
610 hydroxylase. *Biochem. Biophys. Res. Commun.* **250**, 506–510 (1998).
- 611 52. H. S. Paul, G. Sekas, S. A. Adibi, Carnitine biosynthesis in hepatic peroxisomes:  
612 Demonstration of  $\gamma$ -butyrobetaine hydroxylase activity. *Eur. J. Biochem.* **203**,  
613 599–605 (1992).
- 614 53. F. J. Clemente, *et al.*, A Selective Sweep on a Deleterious Mutation in CPT1A in  
615 Arctic Populations. *Am. J. Hum. Genet.* **95**, 584–589 (2014).
- 616 54. M. Fumagalli, *et al.*, Greenlandic Inuit show genetic signatures of diet and climate  
617 adaptation. *Science (80-. )*. **349**, 1343–1347 (2015).
- 618 55. J. A. Zoladz, *et al.*, Effect of temperature on fatty acid metabolism in skeletal  
619 muscle mitochondria of untrained and endurance-trained rats. *PLoS One* **12**,  
620 e0189456 (2017).
- 621 56. O. K. Atkin, D. Macherel, The crucial role of plant mitochondria in orchestrating  
622 drought tolerance. *Ann. Bot.* **103**, 581–597 (2009).
- 623 57. C. I. Wu, The genic view of the process of speciation. *J. Evol. Biol.* **14**, 851–865  
624 (2001).
- 625 58. S. Via, Natural selection in action during speciation. *Proc. Natl. Acad. Sci.* **106**,  
626 9939–9946 (2009).
- 627 59. P. Nosil, “A Genetic Mechanism to Link Selection to Reproductive Isolation” in  
628 *Ecological Speciation*, (Oxford Univ. Press, 2012), pp. 109–138.
- 629 60. J. L. Feder, S. M. Flaxman, S. P. Egan, A. A. Comeault, P. Nosil, Geographic  
630 Mode of Speciation and Genomic Divergence. *Annu. Rev. Ecol. Evol. Syst.* **44**, 73–  
631 97 (2013).
- 632 61. A. B. A. Shafer, C. I. Cullingham, S. D. Côté, D. W. Coltman, Of glaciers and  
633 refugia: A decade of study sheds new light on the phylogeography of northwestern  
634 North America. *Mol. Ecol.* **19**, 4589–4621 (2010).
- 635 62. S. Mehta, Oxidation of Fatty Acids - via Beta-Oxidation | Biochemistry Notes |  
636 PharmaXChange.info. *Biochem. Notes, Notes* (2013).
- 637 63. A. L. Beaudet, Brain carnitine deficiency causes nonsyndromic autism with an  
638 extreme male bias: A hypothesis. *BioEssays* **39**, 1–25 (2017).



640 **Figures**

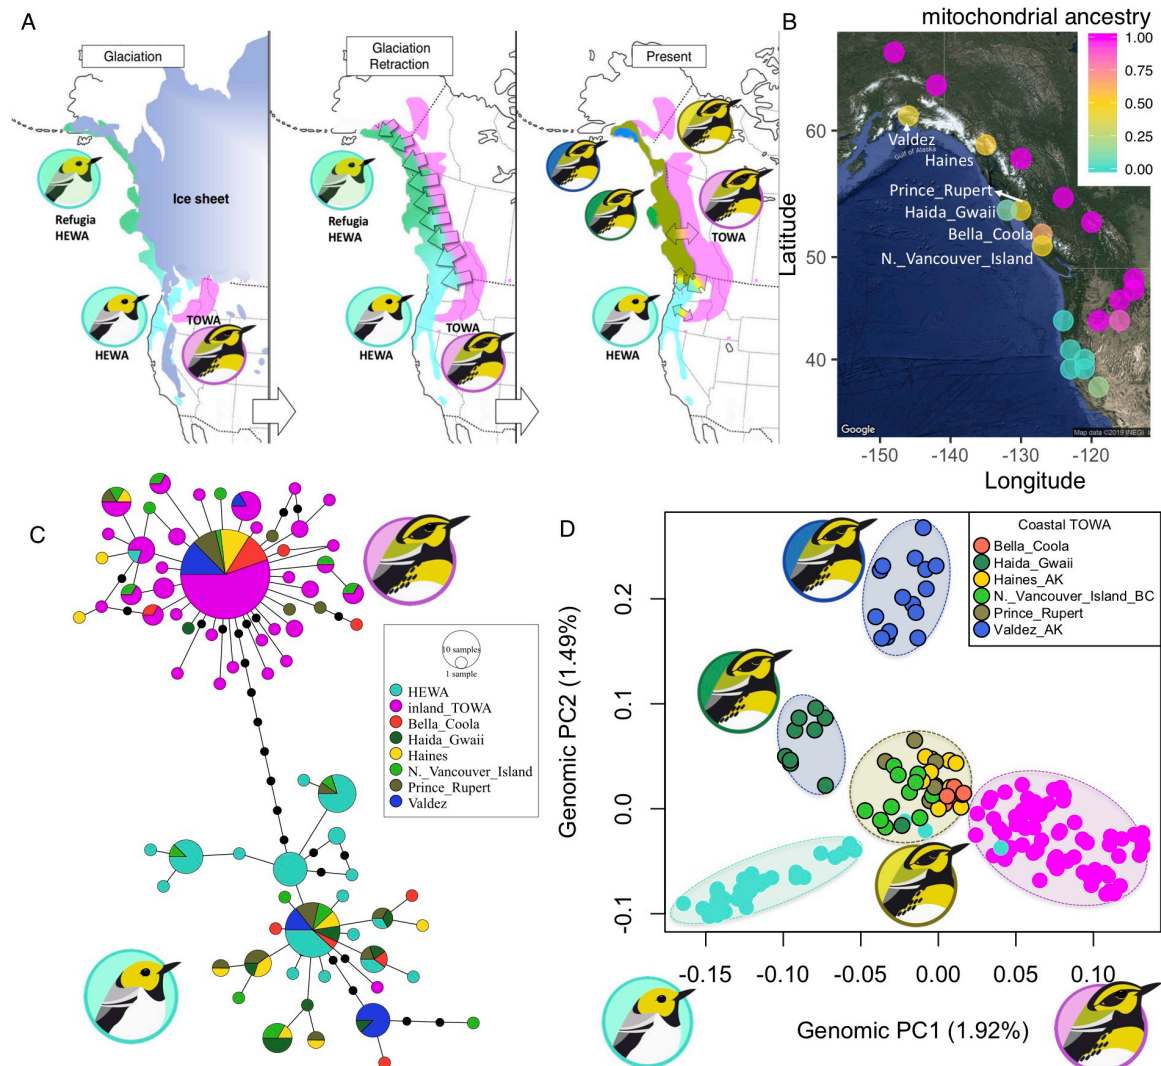

641  
 642 **Figure 1** c-TOWA demonstrates admixed mitochondrial and nuclear ancestry of HEWA  
 643 and i-TOWA. (A) Illustration of the history of differentiation and hybridization between  
 644 TOWA and HEWA during glacial expansion and retraction. Left: During the last glacial  
 645 maxima, the HEWA and TOWA populations resided in isolated glacial refugia. Center:  
 646 after glacial retraction, the refugial HEWA and i-TOWA expanded and hybridized along  
 647 a broad inland-to-coastal front parallel to the coast. Right: the historical hybridization  
 648 resulted in c-TOWA populations with admixed ancestry although the plumage resembles  
 649 that of i-TOWA. Population substructure within c-TOWA could be a result of refugia  
 650 isolation. (B) Distribution of mitochondrial ancestry of HEWA, c-TOWA, i-TOWA sites.  
 651 (C) Haplotype network of mitochondrial NADH gene in HEWA, i-TOWA, and various  
 652 c-TOWA populations, with mtDNA sequences from (24). Each circle represents a  
 653 haplotype and area of the circles are proportional to the number of individuals carrying  
 654 each haplotype. The lines (regardless of their lengths) between the circles represent one  
 655 mutation between haplotypes, the black dots on the lines represent additional mutations  
 656 among haplotypes. The c-TOWA (Bella Coola: orange, Haida Gwaii: dark green; Haines:

657 yellow; North Vancouver Island: light green; Prince Rupert: brown; Valdez: royal blue)  
658 populations harbor admixed mtDNA haplotype (some mtDNA haplotypes nested within  
659 the turquoise HEWA (banding code: “HEWA”) cluster whereas some are in the magenta  
660 colored i-TOWA cluster). **(D)** Principle component analysis of 19083 high quality SNPs  
661 in the genome. The c-TOWA is intermediate in PC1 but distinct from i-TOWA and  
662 HEWA in PC2. PC1 represents admixture between i-TOWA and HEWA, and PC2  
663 represents unique differentiation of c-TOWA.  
664



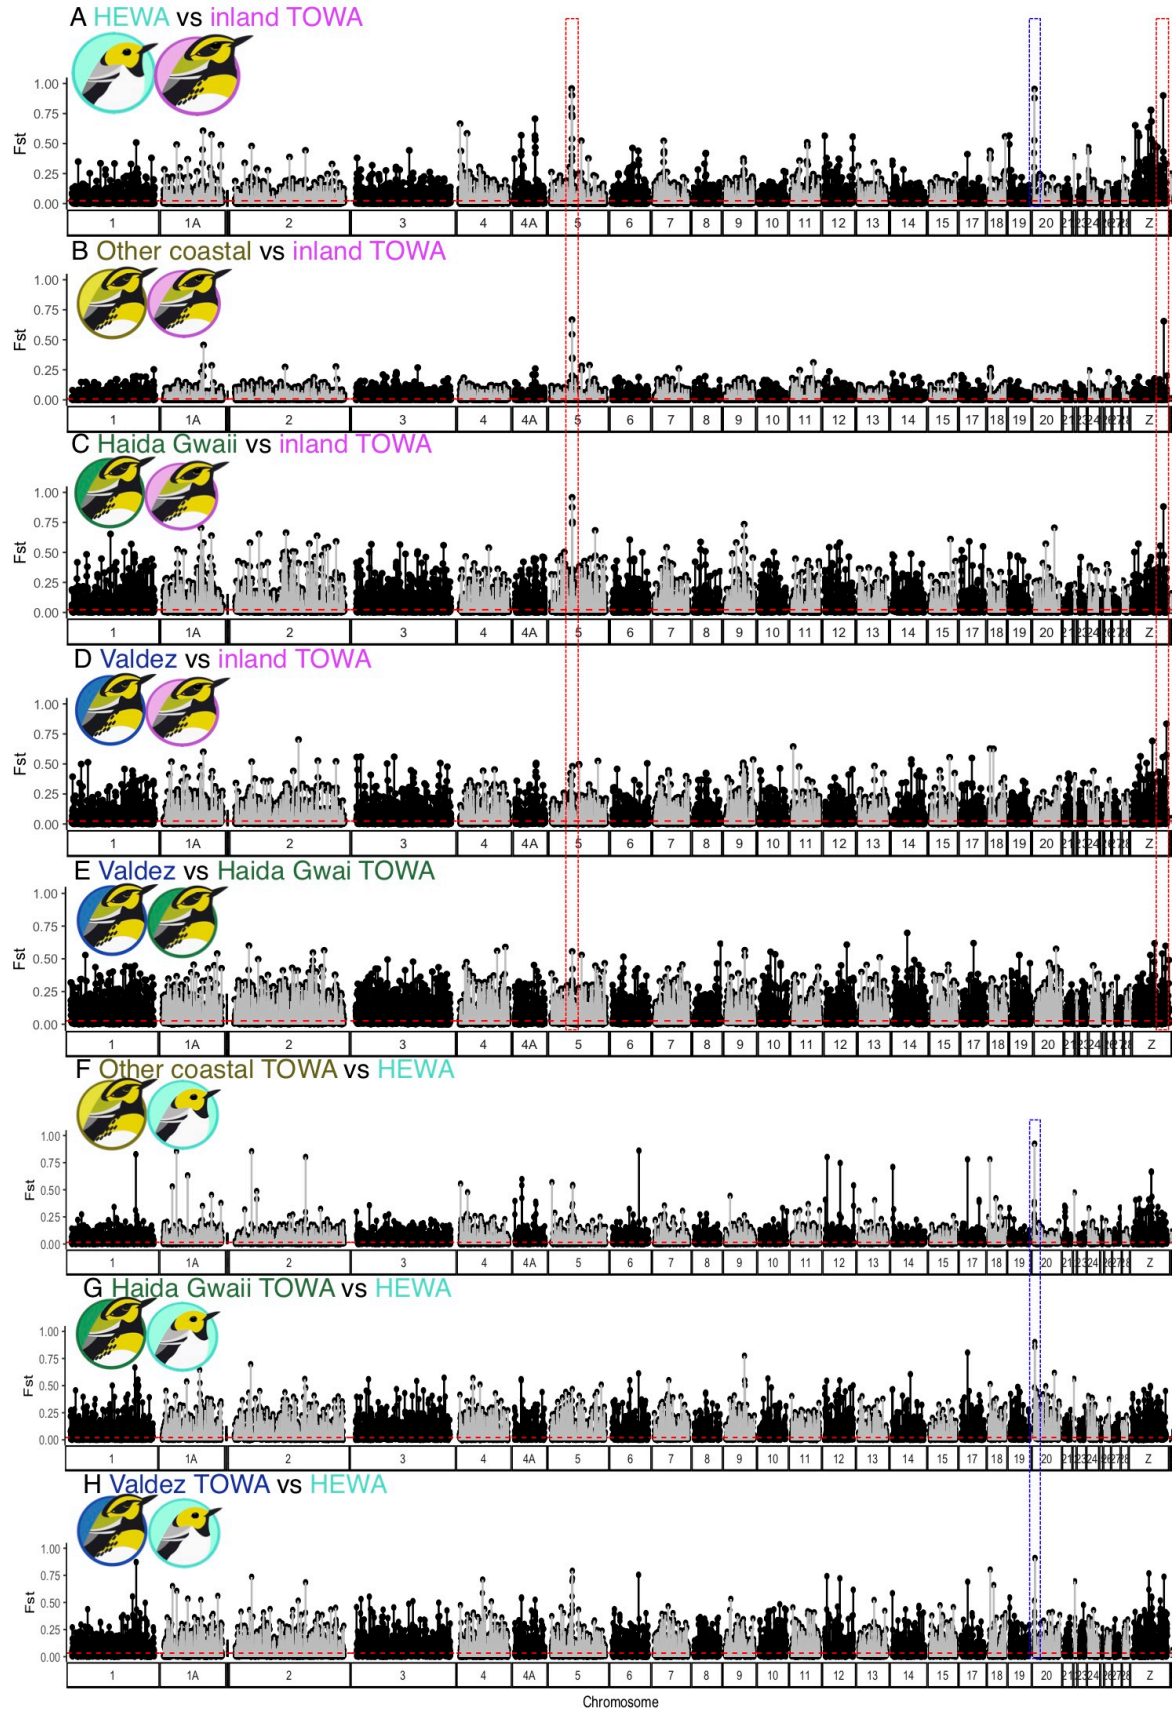

666 **Figure 2**  $F_{ST}$  scan between HEWA and i-TOWA (A), other coastal and i-TOWA (B-D),  
 667 between Valdez and Haida Gwaii c-TOWA (E), as well as HEWA and c-TOWA (F-G).  
 668 Three distinctive differentiation peaks were found between inland and coastal *townsendi*  
 669 that reside in chromosome 1A, 5 and Z (red boxes, A-C). The RALY locus demonstrates  
 670 consistent differentiation between HEWA and various TOWA (blue boxes, F-G). The red  
 671 horizontal dotted lines represent the genome-wide mean  $F_{ST}$ .  
 672  
 673

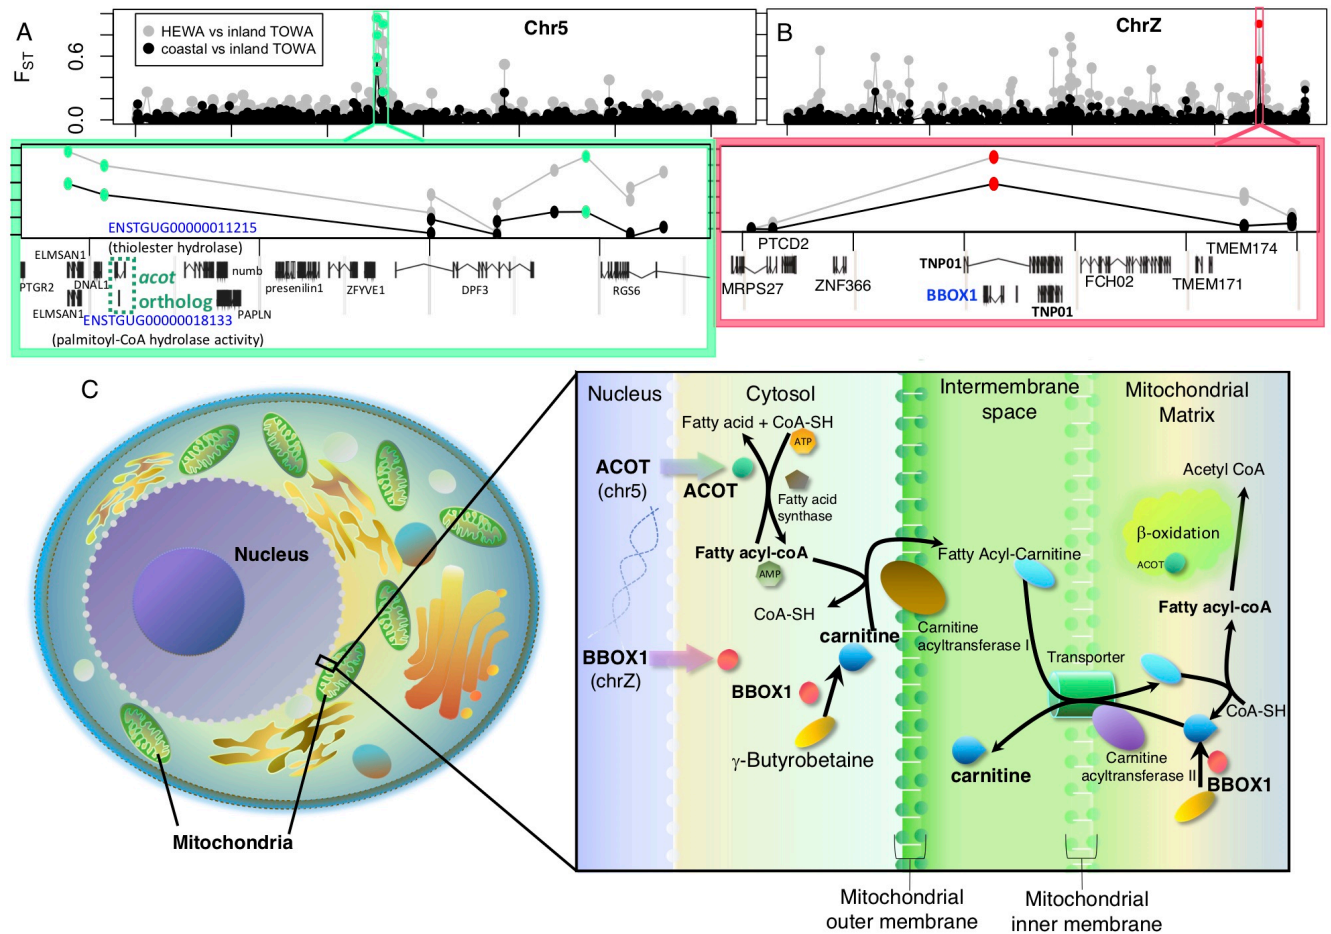

674 **Figure 3** c-TOWA (black) and HEWA (grey) exhibit concordant genetic differentiation  
 675 from i-TOWA at regions in chr 5 (A) and Z (B) that are associated with genes involved in  
 676 mitochondrial fatty acid metabolism (C). A-B, the window of  $F_{ST}$  scan on chr 5 (A) and Z  
 677 (B) around the  $F_{ST}$  peaks. On the bottom, there is a vertical grey line every 10,000 bases.  
 678 A, the region of differentiation delineated by the jade green  $F_{ST}$  peaks are significantly  
 679 enriched for acyl-CoA metabolism, because of the two orthologs of ACOT (inside the  
 680 dotted jade green box). B, the violet red  $F_{ST}$  peak is localized at the Z-chromosome within  
 681 the intron of gene BBOX1 (involved in fatty acid transportation across mitochondria  
 682 membranes) and a cyto-nuclear signaling gene TNP01. C, Illustration of the  
 683 mitochondrial carnitine shuttle in which the nuclear genes associated with chr 5 (ACOT)  
 684 and Z (BBOX1) differentiation were bolded. BBOX1 synthesizes carnitine (bolded),  
 685 which is essential to transport fatty acyl-coA (bolded) into mitochondrial matrix for beta-  
 686

687 oxidation. If not transported into mitochondria, the fatty acyl-coA can be converted back  
688 to fatty acid catalyzed by ACOT. This illustration is a synthesis of existing illustrations  
689 on carnitine shuttle (62, 63).  
690  
691

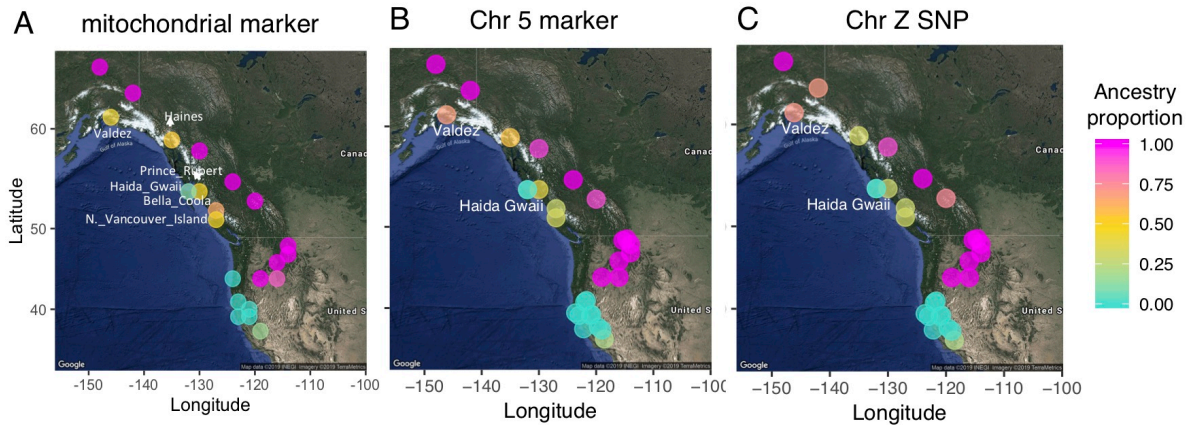

692  
693 **Figure 4** Correlated distribution of ancestry proportion (0 = HEWA ancestry, colored in  
694 turquoise; 1 = i-TOWA ancestry, colored in magenta) of mtDNA marker (A), and nDNA  
695 markers (B-C) related to mitochondrial fatty acid metabolic on chr 5 (B) and Z (C).  
696 There is significant correlation between mitochondrial and nuclear genetic markers after  
697 controlling for genome-wide ancestry (Partial Mantel Test,  $p < 0.05$ ).



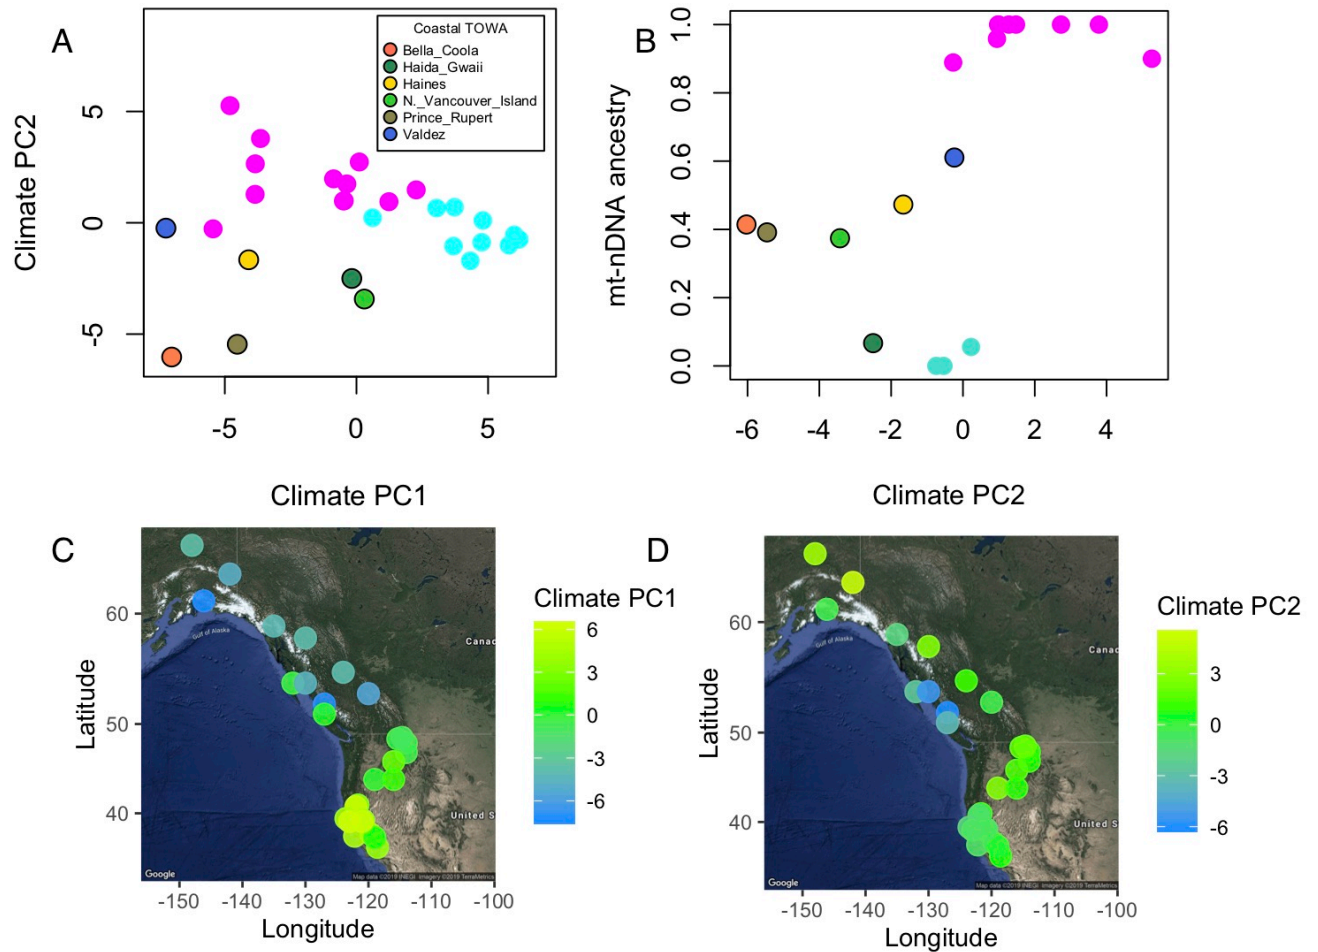

698  
699  
700  
701  
702  
703  
704  
705  
706  
707

**Figure 5** Climate principal component analysis of 26 climate variables from ClimateWNA. **(A)** Climate PC1 and **(B)** PC2, in which HEWA (turquoise), i-TOWA (magenta) and c-TOWA habitats are different. **(B)** Site mean mtDNA and candidate nuclear marker ancestry is correlated with local climate PC2. **(C)-(D)**, spatial distribution of climate PC1 **(C)** and PC2 **(D)**.

### Supplementary Figures

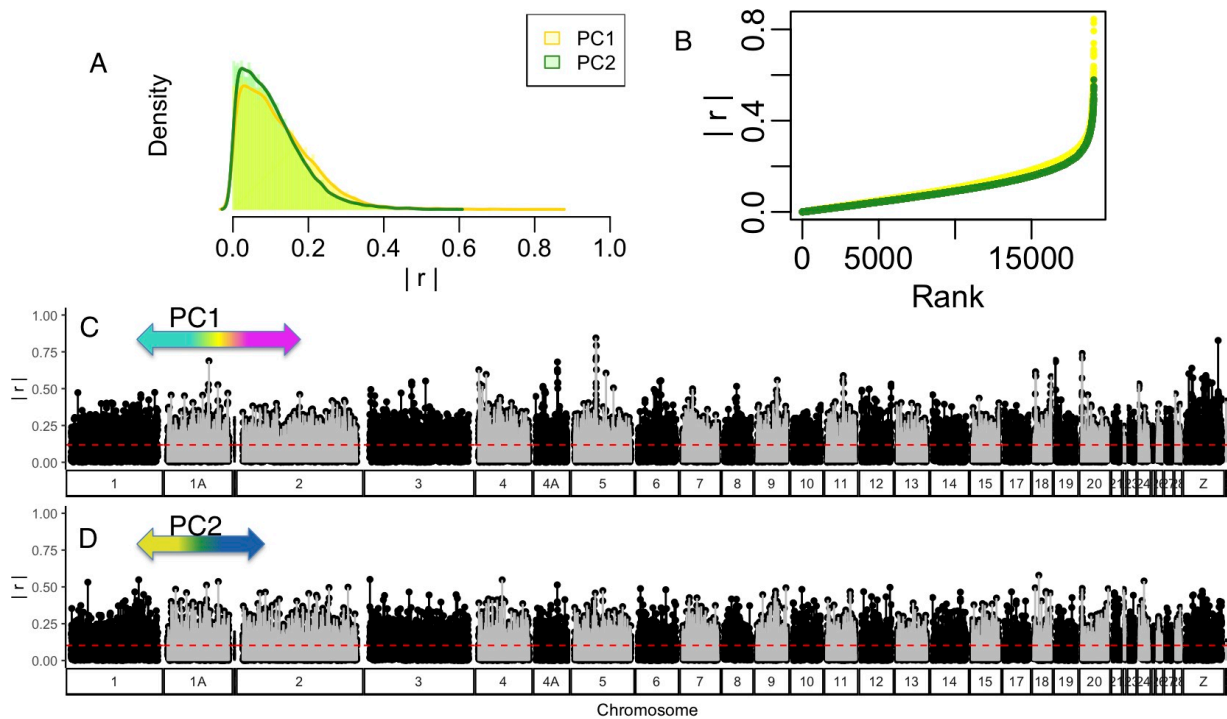

708  
709 **Figure S1 A**, Density distribution of absolute correlation coefficient of each SNP with  
710 PC1 (yellow shade) and PC2 (green shade). **B**, There were more SNPs that are highly-  
711 correlated with PC1 (yellow line) than PC2 (green line). **C**, **D**, Absolute correlation  
712 coefficient between SNPs and PC1 (**C**) and PC2 (**D**). The horizontal red dash lines are  
713 the mean. **C**, certain regions in chromosome 1A, 5, 18, 20, and Z are highly correlated  
714 with PC1. **D**, SNPs are correlated with PC2 similarly across the genome (no obvious  
715 peaks).

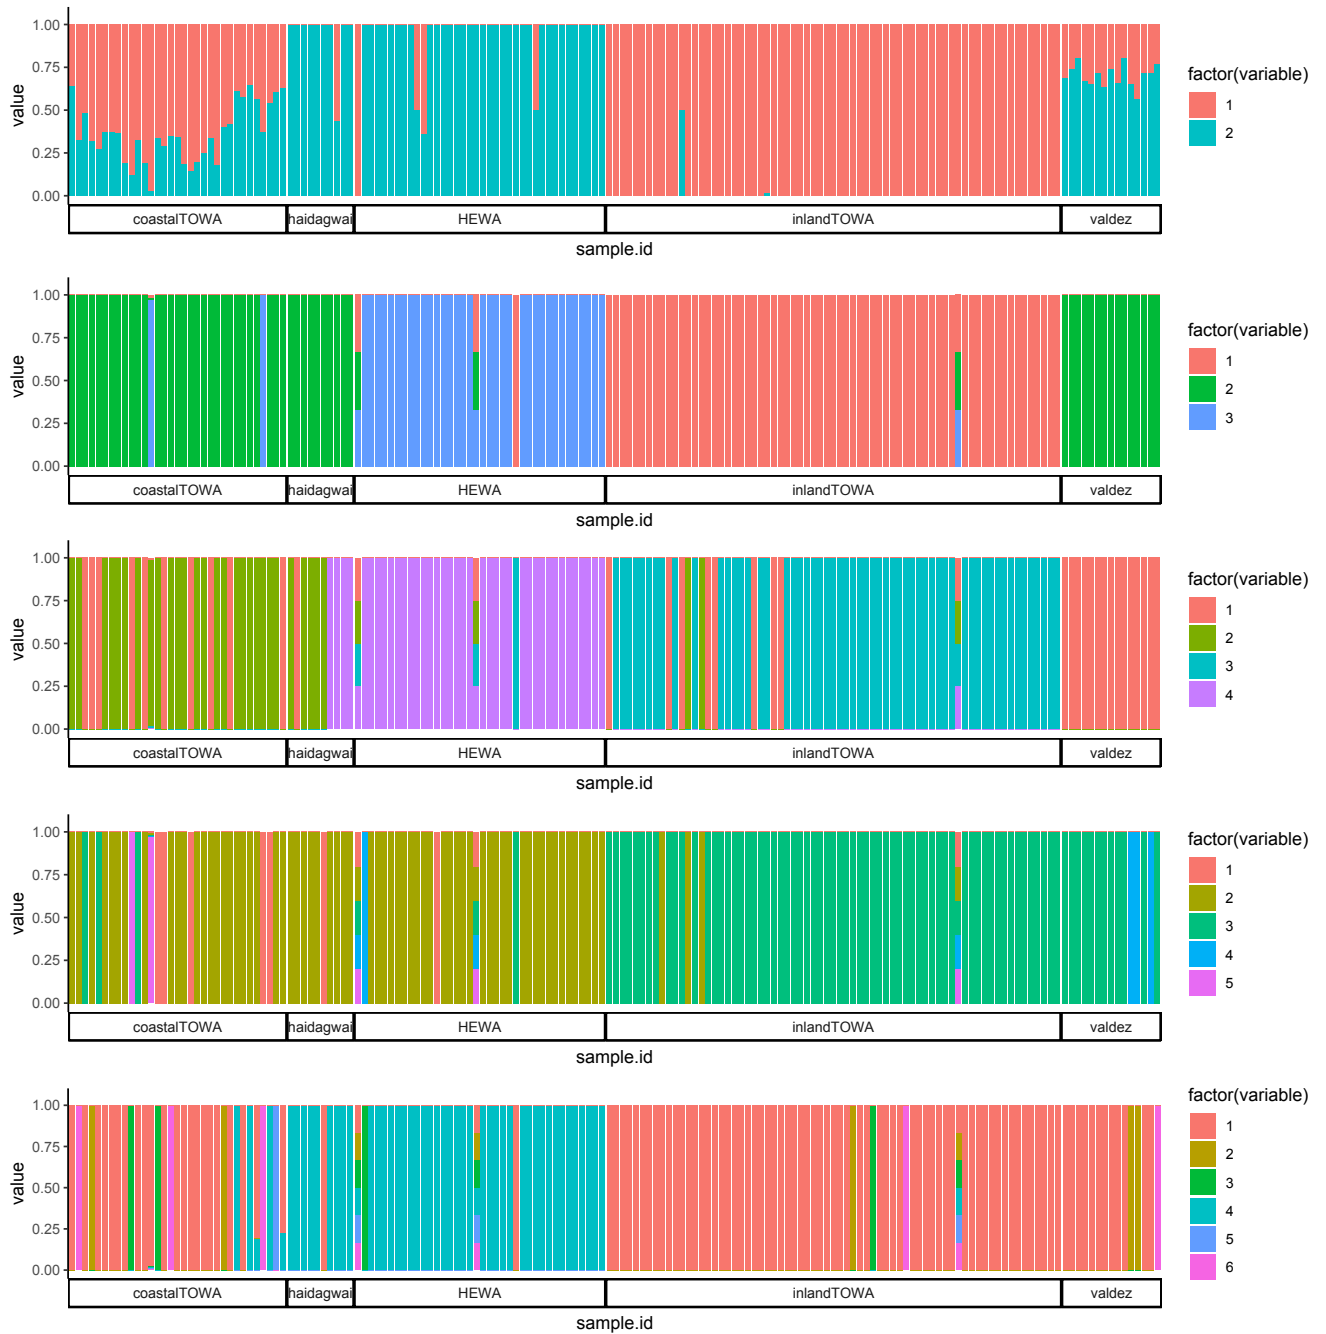

716  
717  
718  
719  
720  
721  
722  
723

**Figure S2** Faststructure analysis with  $k = 1$  to  $6$  of the 165 individuals collected from HEWA, i-TOWA, Haida Gwaii c-TOWA, Valdez c-TOWA, and other c-TOWA populations.

724  
725

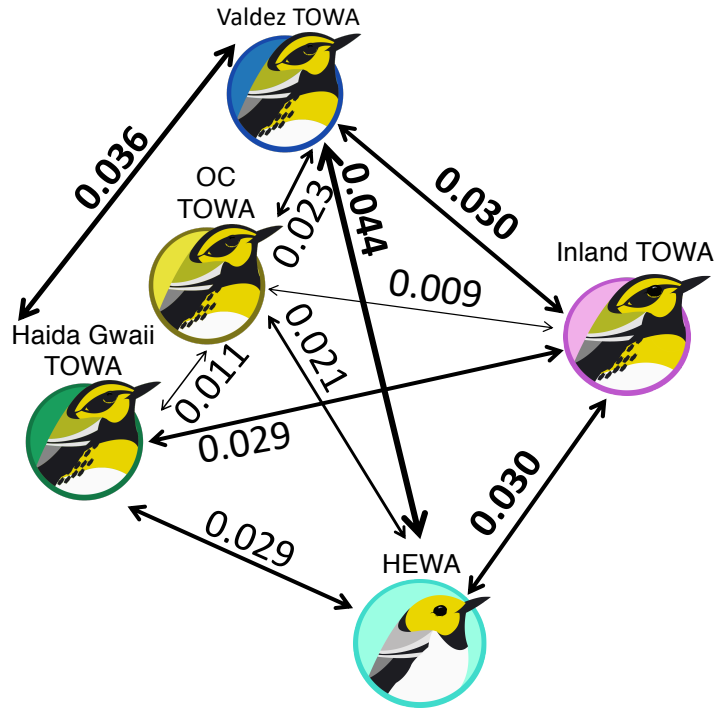

726  
727  
728  
729  
730  
731  
732  
733  
734  
735

**Figure S3** The Weir & Cockerham weighted  $F_{ST}$  among HEWA, inland and coastal TOWA (green: Haida Gwaii, blue: Valdez, dark yellow: other coastal (OC) c-TOWA), which demonstrates a gradient of differentiation from the parental populations (i-TOWA, colored as magenta; HEWA, color in turquoise). Each double-head arrow represents a pairwise comparison among the populations. The populations are oriented as their relative geographical location. The widths of the arrows are weighted by the  $F_{ST}$  between each pair of populations. Surprisingly some c-TOWA populations demonstrates significantly greater differentiation (paired t-test,  $p < 0.001$ ) from the parental populations than between the parental populations ( $F_{ST} = 0.03$ ).

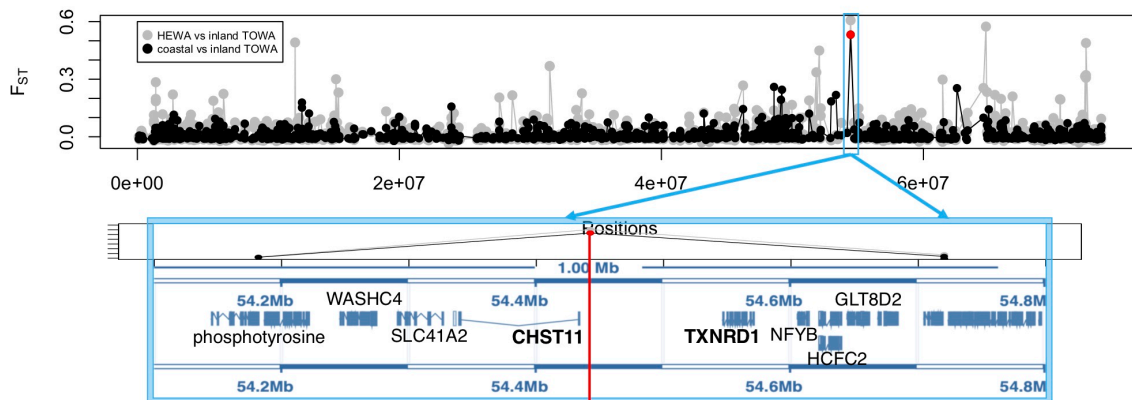

736  
737

**Figure S4**  $F_{ST}$  scan between HEWA and i-TOWA (grey) and between i-TOWA and c-

738 TOWA (black) across chromosome 1A. The strongest  $F_{ST}$  peak (red dot) is concordant  
739 between the two comparisons (grey versus black). Zooming in around this peak (blue  
740 box), this peak is in the intergenic region between gene CHST11 and TXNRD1.  
741

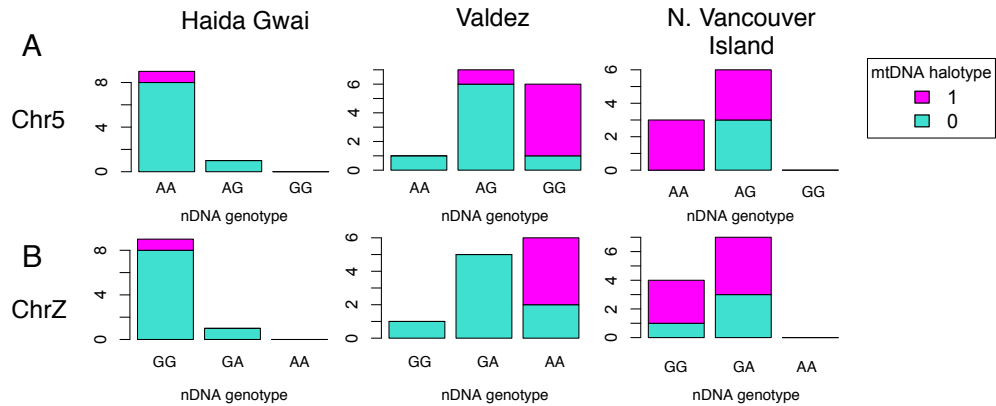

742  
743 **Figure S5** Bar plots showing the mitonuclear ancestry association within Haida Gwaii  
744 and Valdez c-TOWA populations (A, chr5 marker; B, chr Z marker).  
745  
746

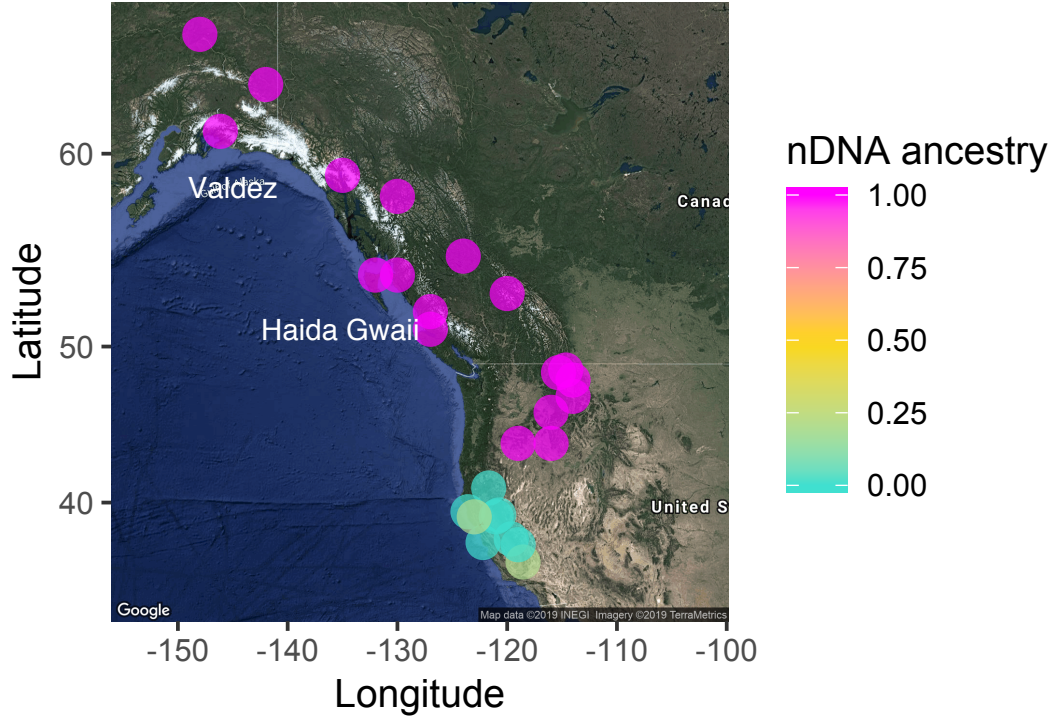

747  
748 **Figure S6** Geographical distribution of RALY ancestry.



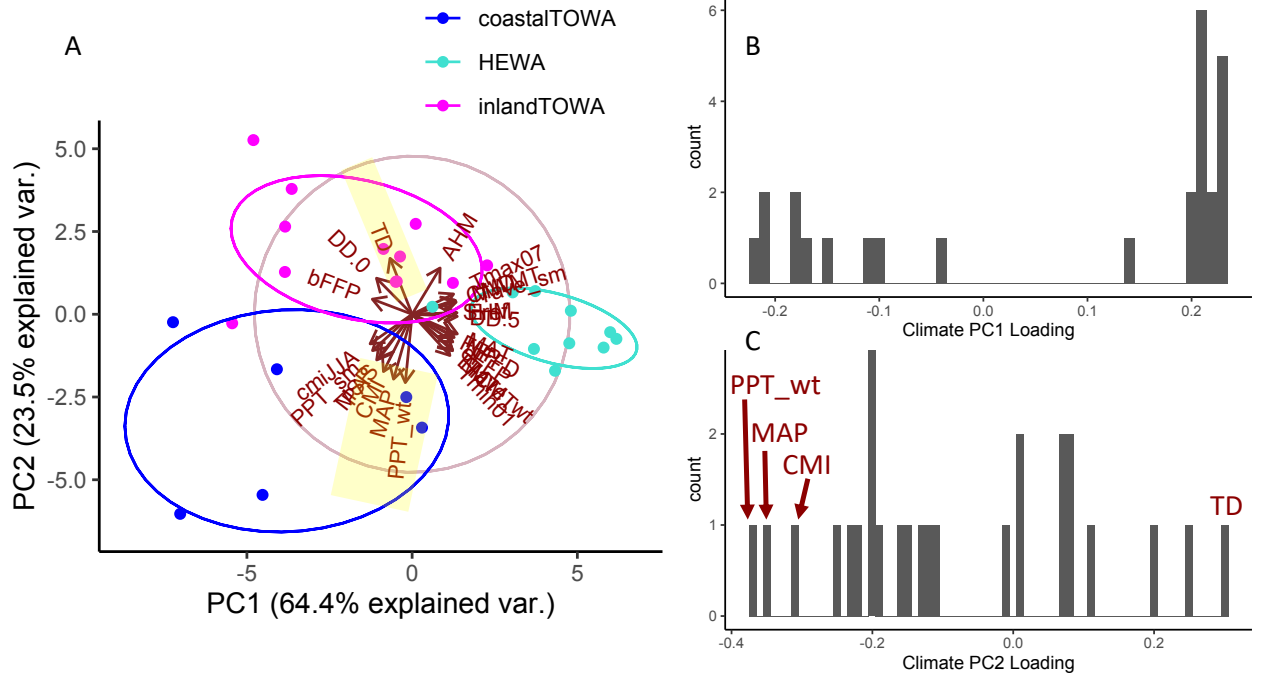

749  
750  
751  
752  
753  
754  
755  
756  
757

**Figure S7** Dissecting climate PCA: **A**, biplot of PCA demonstrating loadings of the 26 climate variables in the PC space. **B**, **C**, histogram of variable loading for PC1 (**B**) and PC2 (**C**). Most of the variables demonstrates strong and even loading along PC1 (**B**), while there are 4 outstanding variables (highlighted in yellow, **A**) explaining PC2 (**C**): Temperature Difference (TD), Climate Moisture Index (CMI), Mean Annual Precipitation (MAP), Winter Precipitation (PPT\_wt).

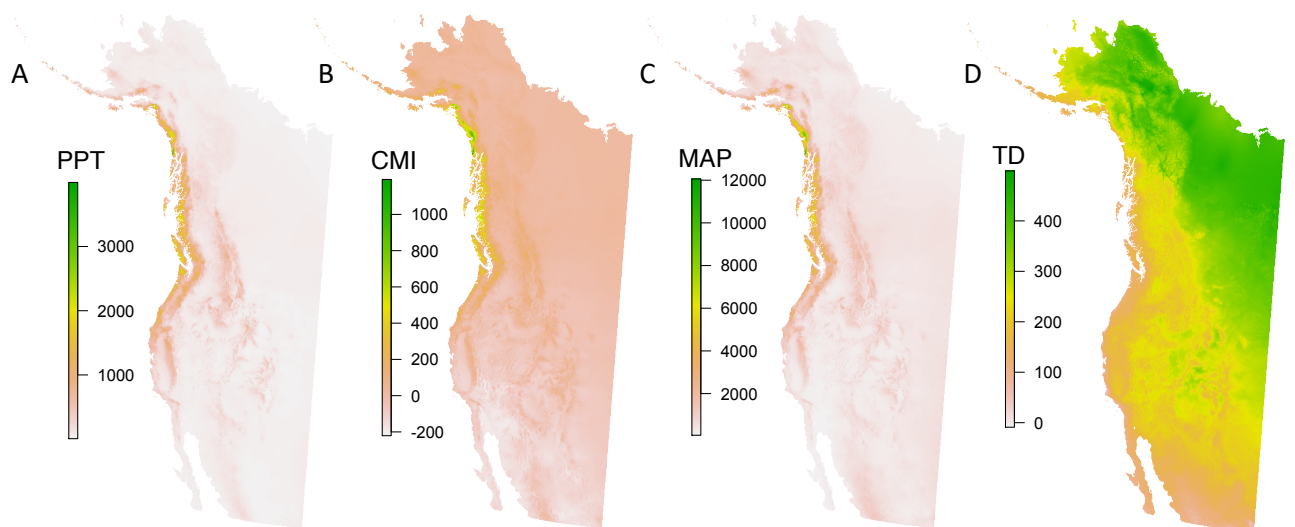

758

759 **Figure S8** Map demonstrating spatial variation of the 4 key climate variables explaining  
 760 climate PC2 (see Figure 7, S3): **A**, Winter Precipitation (PPT\_wt), **B**, Climate Moisture  
 761 Index (CMI), **C**, Mean Annual Precipitation (MAP), **D**, Temperature Difference (TD).  
 762

763 **Table S1** Definitions of climate variables

| <b>Column name</b> | <b>Variable abbreviation</b> | <b>Variable Name</b>                              |
|--------------------|------------------------------|---------------------------------------------------|
| NORM_6190_AHM      | AHM                          | annual heat-moisture index                        |
| NORM_6190_bFFP     | bFFP                         | The day of the year on which FFP begins           |
| NORM_6190_CMD      | CMD                          | Climatic moisture deficit                         |
| NORM_6190_CMI      | CMI                          | Climatic moisture index                           |
| NORM_6190_cmiJJA   | cmiJJA                       | Hogg's summer (June-Aug) climate moisture index   |
| NORM_6190_DD.0     | DD.0                         | degree-days below 0°C, chilling degree-days       |
| NORM_6190_DD.5     | DD.5                         | degree-days above 5°C, growing degree-days        |
| NORM_6190_eFFP     | eFFP                         | The day of the year on which FFP begins           |
| NORM_6190_EMT      | EMT                          | Extreme minimum temperature over 30 years         |
| NORM_6190_Eref     | Eref                         | Hargreaves reference evaporation (mm)             |
| NORM_6190_FFP      | FFP                          | Frost-free period                                 |
| NORM_6190_MAP      | MAP                          | Mean annual precipitation (mm)                    |
| NORM_6190_MAT      | MAT                          | Mean annual temperature                           |
| NORM_6190_MCMT     | MCMT                         | Mean coldest month temperature (°C)               |
| NORM_6190_MSP      | MSP                          | May through September precipitation               |
| NORM_6190_MWMT     | MWMT                         | Mean winter temperature                           |
| NORM_6190_NFFD     | NFFD                         | number of frost-free days                         |
| NORM_6190_PAS      | PAS                          | precipitation as snow                             |
| NORM_6190_PPT_sm   | PPT_sm                       | summer precipitation (mm)                         |
| NORM_6190_PPT_wt   | PPT_wt                       | winter precipitation (mm)                         |
| NORM_6190_SHM      | SHM                          | summer heat-moisture index<br>((MWMT)/(MSP/1000)) |
| NORM_6190_Tave_sm  | Tave_sm                      | summer mean temperature (°C)                      |
| NORM_6190_Tave_wt  | Tave_wt                      | winter mean temperature (°C)                      |
| NORM_6190_TD       | TD                           | Continentality                                    |
| NORM_6190_Tmax07   | Tmax07                       | winter mean maximum temperature (°C)              |
| NORM_6190_Tmin01   | Tmin01                       | winter mean minimum temperature (°C)              |

764

765

766 **Table S2** The loading of variables in the climate PCA sorted by their loading along PC1.

| <b>Climate Variable</b> | <b>PC1 loading</b> | <b>PC2 loading</b> |
|-------------------------|--------------------|--------------------|
| cmiJJA                  | -0.21763162        | -0.161032306       |
| bFFP                    | -0.20625054        | 0.082056348        |
| PPT_sm                  | -0.20510277        | -0.197710506       |

|         |             |              |
|---------|-------------|--------------|
| DD.0    | -0.18472653 | 0.195940506  |
| MSP     | -0.183508   | -0.248663084 |
| PAS     | -0.1660562  | -0.234659637 |
| CMI     | -0.1486023  | -0.311869513 |
| TD      | -0.11435537 | 0.30417286   |
| MAP     | -0.09633503 | -0.352869482 |
| PPT_wt  | -0.03530235 | -0.371886563 |
| AHM     | 0.14480557  | 0.251595965  |
| Tmin01  | 0.19581554  | -0.22437128  |
| SHM     | 0.19978674  | 0.007101683  |
| MCMT    | 0.20705781  | -0.195744433 |
| Tave_wt | 0.20859601  | -0.192174784 |
| EMT     | 0.20990053  | -0.198261928 |
| eFFP    | 0.2107584   | -0.150721133 |
| FFP     | 0.21127471  | -0.117676014 |
| Tmax07  | 0.21473286  | 0.110168321  |
| NFFD    | 0.21782119  | -0.126257635 |
| CMD     | 0.22005085  | 0.076818851  |
| MWMT    | 0.22507318  | 0.074770918  |
| Tave_sm | 0.22805563  | 0.066315194  |
| Eref    | 0.23258512  | 0.008062124  |
| DD.5    | 0.23376903  | -0.011649806 |
| MAT     | 0.23420797  | -0.106646542 |

767

768

769

770

771

772

773
